# Supplementary material for: An ultrasensitive microchip electrophoresis assay based on separation-assisted double cycling signal amplification strategy for microRNA detection in cell lysate
Source: Royal Society of Chemistry journal article supplement (doi:10.1039/c7an02082a), 2018-01-01
Supplement: c7an02082a1.pdf [file c7an02082a1.pdf]

## Supporting Information

### **An ultrasensitive microchip electrophoresis assay based on separation assisted double cycling signal amplification strategy for microRNA quantification in cell lysate**

Kaiji Wei,<sup>a</sup> Jingjin Zhao,<sup>\*a</sup> Xiaoshu Luo,<sup>b</sup> Senghui Qiu,<sup>b</sup> Fuyun He,<sup>b</sup> Shuting Li<sup>a</sup> and Shulin Zhao<sup>\*a</sup>

<sup>a</sup>State Key Laboratory for the Chemistry and Molecular Engineering of Medicinal Resources, Guangxi Normal University, Guilin, 541004, China

<sup>b</sup>College of Electronic Engineering, Guangxi Normal University, Guilin, 541004, China

E-mail: zhaoshulin001@163.com; jzhao12@163.com.

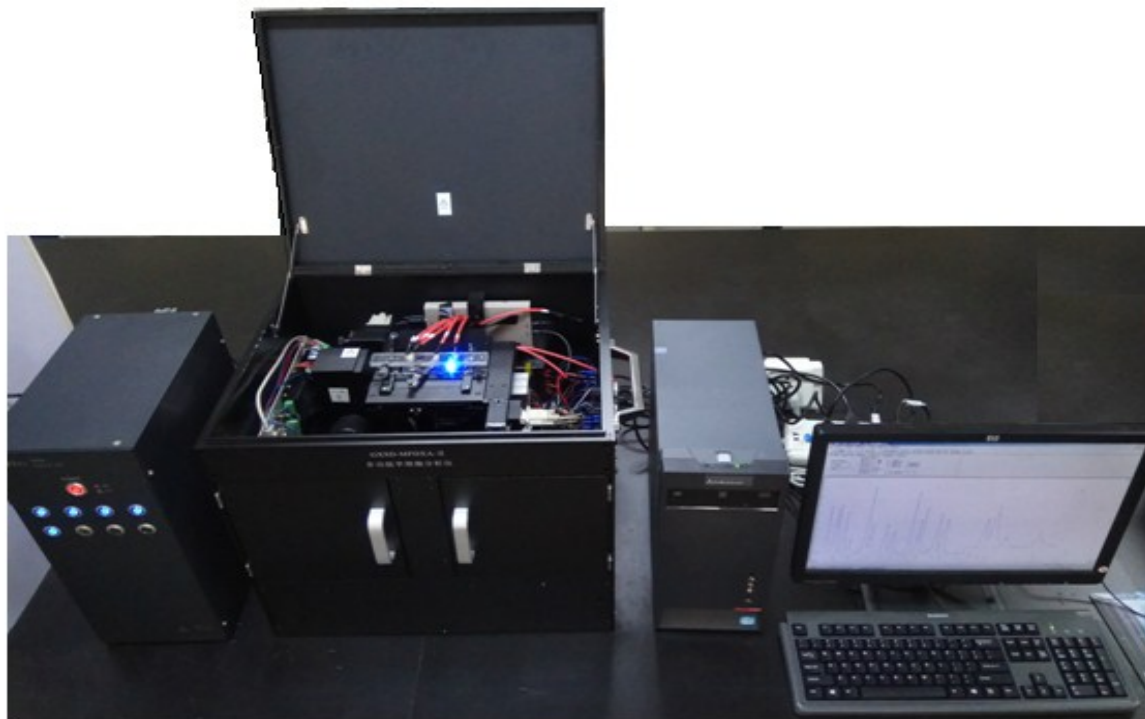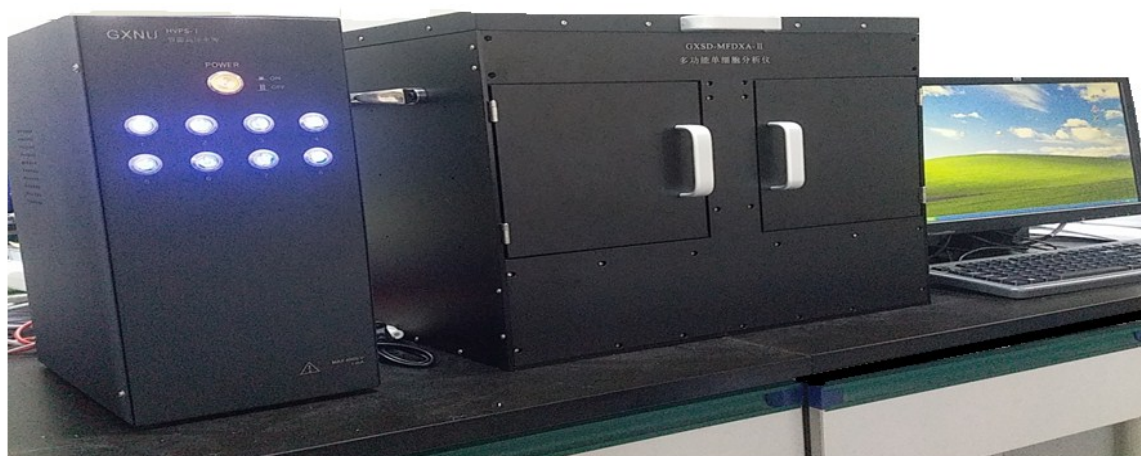

**Figure S1.** The MCE-LIF detection system developed by our laboratory.

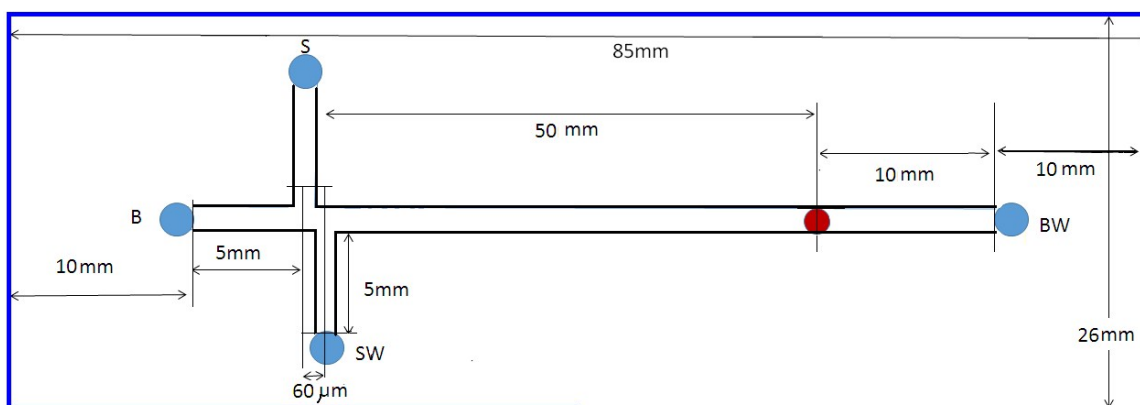

**Figure S2.** Dimensions and layout of the glass microchip. S: sample reservoir; B: buffer reservoir; SW: sample waste reservoir; BW: buffer waste reservoir; R: the oxidizer reagent reservoir.

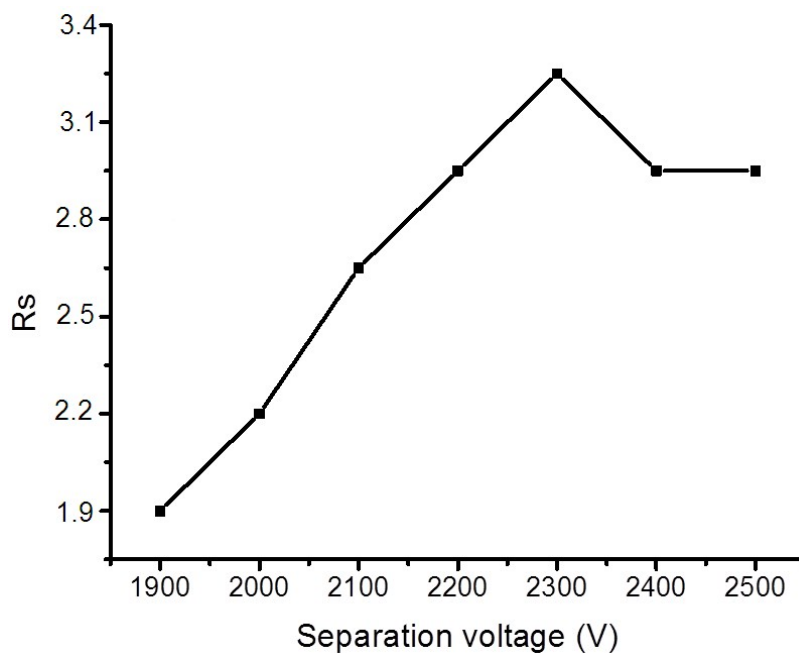

**Figure S3.** Influence of application voltage on the separation. The electrophoresis buffer is 30 mM borate solution at pH 9.2 with 30 mM SDS.

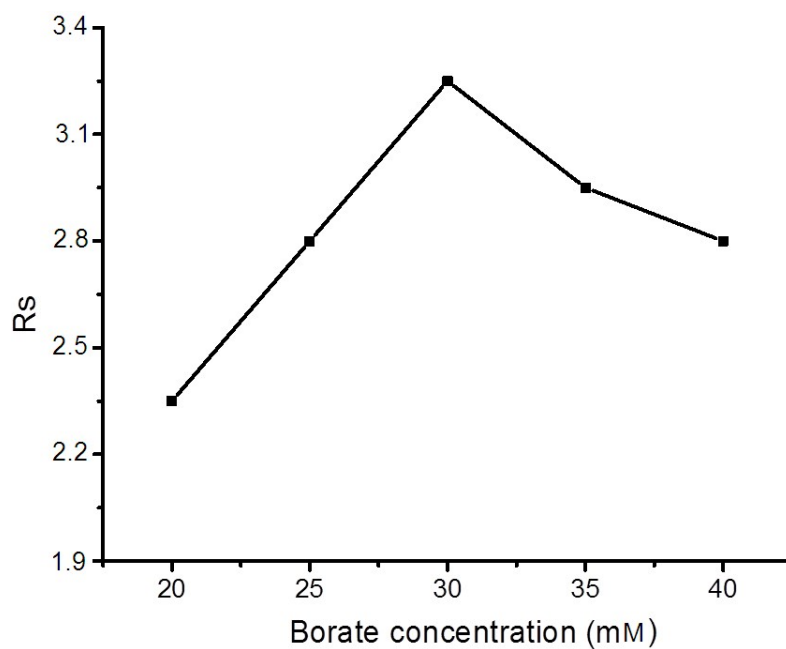

**Figure S4.** Influence of electrophoresis buffer concentration on the separation. The electrophoresis buffer comprises of borate solution of different concentrations at pH 9.2 and 30 mM SDS.

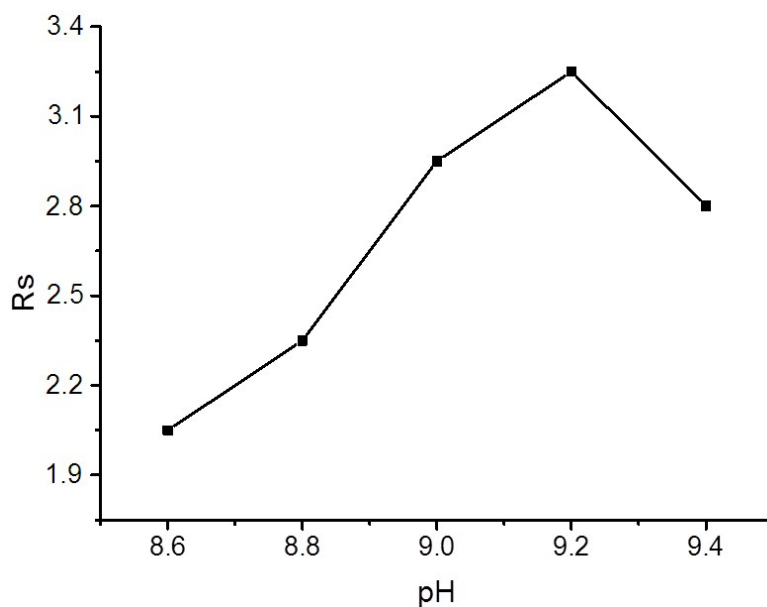

**Figure S5.** Influence of electrophoresis buffer pH on the separation. The electrophoresis buffer comprise of 30 mM borate and 30 mM SDS.

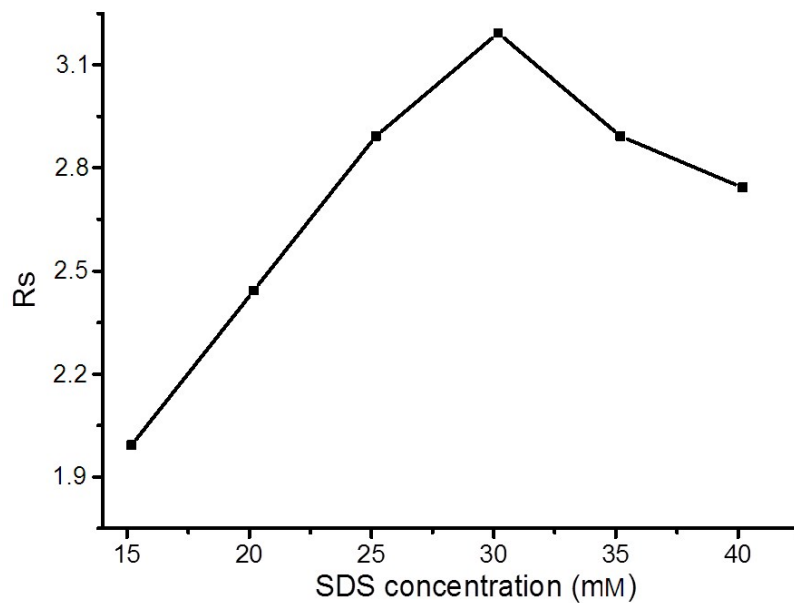

**Figure S6.** Influence of SDS concentration on the separation. The electrophoresis buffer contained 30 mM borate solution at pH 9.2, with different concentrations of SDS.

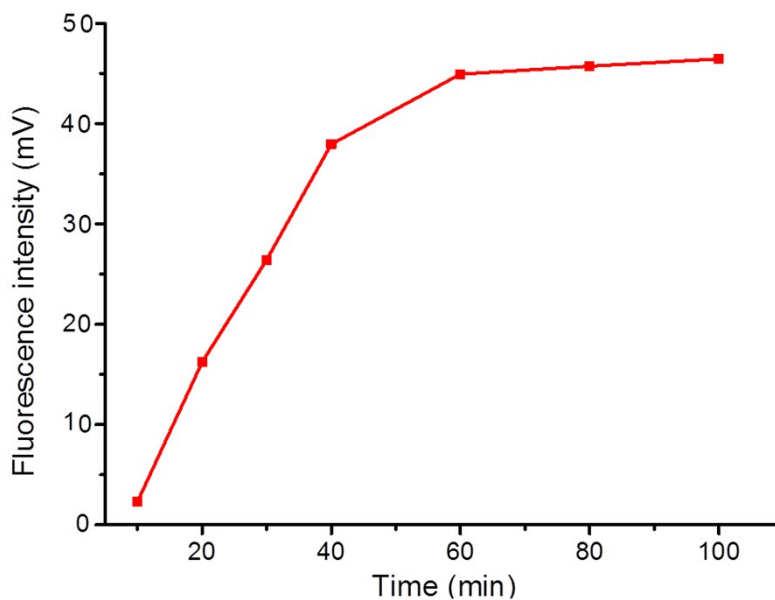

**Figure S7.** Influence of incubation time on the fluorescence intensity.  $C_{P1/P2}=2.0 \times 10^{-9}$  M;  $C_{miRNA} = 2.0 \times 10^{-11}$  M and  $C_{MB}= 5.0 \times 10^{-9}$  M. The amount of T7 Exo is 25 U.

**Table S1.** DNA/RNA fragment sequences used in this work\*

| Name       | Sequences (5' to 3') description           |
|------------|--------------------------------------------|
| miRNA-141  | UAACACUGUCUGGUAAAGAUGG                     |
| P1         | <i>CCATCTTACCAGACAGTGAGGGTTAAAA</i>        |
| P2         | CCCGCTA <u>ACCCTCACTGTCT</u> AAAA          |
| MB         | FAM-TTAGACAGTGAGGGTTAGGTTAC <u>CTCACTG</u> |
| miR-141-1a | UAACACUGUCUGGUAAAGAUGA                     |
| miR-141-1b | UAACACUGUCUGGUACAGAUGG                     |
| miR-141-1c | UAACACUGUCAGGUAAAGAUGG                     |
| miR-141-2a | UAACACUGUAUGGCAAAGAUGG                     |
| miR-141-2b | UAACACGGUCUGGUACAGAUGG                     |

\* The italicized sequences of miRNA-141 and P1 are completely complementary. The underlined sequences of P1 and P2 are complementary and hybridizable, and the red sequence of P2 is complementary and hybridizable with MB. The underlined sequence in MB is its stem.

**Table S2.** Comparison of different methods for miRNA detection

| Methods                                                                                                     | Detection limit | Dynamic range | References |
|-------------------------------------------------------------------------------------------------------------|-----------------|---------------|------------|
| T 7 exonuclease-assisted cyclic enzymatic amplification method coupled with rolling circle amplification    | 12 fM           | 25 fM-1 pM    | 1          |
| WS <sub>2</sub> nanosheet mediated fluorescence quenching and duplex-specific nuclease signal amplification | 300 fM          | 1 pM-10 nM    | 2          |
| Hairpin probe-based circular exponential amplification assay                                                | 380 fM          | 1 pM -10 nM   | 3          |
| Non-enzymatic target recycling amplification                                                                | 80 fM           | 0.1 pM-10 nM  | 4          |
| Target-primed and branched rolling-circle amplification                                                     | 10 fM           | 25 fM -2.5 pM | 5          |
| Target induced adenosine <sub>2</sub> -coralyne-adenosine <sub>2</sub> formation                            | 0.53 nM         | 0 -100 nM     | 6          |
| Target-fueled DNA walker                                                                                    | 58 fM           | 100 fM-1 nM   | 7          |
| MCE assay based on separation assisted double cycling signal amplification strategy                         | 8 fM            | 20 fM-20 pM   | This work  |

## Reference

- 1 L. Cui, Z. Zhu, N. Lin, H. Zhang, Z. Guan and C. J. Yang, *Chem. Commun.*, 2014, **50**, 1576-1578.
- 2 Q. Xi, D. M. Zhou, Y. Y. Kan, J. Ge, Z. K. Wu, R. Q. Yu and J. H. Jiang, *Anal. Chem.*, 2014, **86**, 1361-1365.
- 3 G. L. Wang and C. Y. Zhang, *Anal. Chem.*, 2012, **84**, 7037-7042.
- 4 X. Li, D. Li, W. Zhou, Y. Chai, R. Yuan and Y. Xiang, *Chem. Commun.*, 2015, **51**, 11084-11087.
- 5 Y. Cheng, X. Zhang, Z. Li, X. Jiao, Y. Wang, and Y. Zhang, *Angew. Chem.*, 2009, **121**, 3318 -3322.
- 6 J. J. Li, Q. Xi, W. F. Du, R. Q. Yu and J. H. Jiang, *Analyst*, 2016, **141**, 2384-2387.
- 7 L. Wang, R. Deng and J. Li, *Chem. Sci.*, 2015, **6**, 6777-6782.
